# Supplementary material for: The potential roles of circRNAs in osteoarthritis: a coming journey to find a treasure
Source: PubMed Central journal article supplement (PMC6209588; doi:10.1042/bsr20180542), 2018-10-31
Supplement: bsr20180542_Supp1.pdf [file bsr20180542_Supp1.pdf]

**Table S1: CircRNA-related databases and their useful functions**

| Databases       | Year | Function                                                                                                                                                                                 | Website                                                                                             |
|-----------------|------|------------------------------------------------------------------------------------------------------------------------------------------------------------------------------------------|-----------------------------------------------------------------------------------------------------|
| RegRNA 2.0      | 2013 | Predict miRNA-circRNA interactions                                                                                                                                                       | <a href="http://regrna2.mbc.nctu.edu.tw">http://regrna2.mbc.nctu.edu.tw</a>                         |
| Circ2Traits     | 2013 | Collect disease-associated circRNAs                                                                                                                                                      | <a href="http://gyanxet-beta.com/circdb/">http://gyanxet-beta.com/circdb/</a>                       |
| circBase        | 2014 | Provide gene description, genomic position of circRNAs                                                                                                                                   | <a href="http://www.circbase.org">http://www.circbase.org</a>                                       |
| circRNABase     | 2014 | Predict miRNA-circRNA interactions                                                                                                                                                       | <a href="http://starbase.sysu.edu.cn/mirCircRNA.php">http://starbase.sysu.edu.cn/mirCircRNA.php</a> |
| circinteractome | 2016 | Predict miRNA-circRNA interactions;<br>Design junction-spanning primers of circRNAs;<br>Design siRNAs for circRNA silencing;<br>Identify potential internal ribosomal entry sites (IRES) | <a href="http://circinteractome.nia.nih.gov">http://circinteractome.nia.nih.gov</a>                 |
| CircNet         | 2016 | Provide tissue-specific circRNA expression profiles;<br>Provide circRNA-miRNA-gene regulatory networks                                                                                   | <a href="http://circnet.mbc.nctu.edu.tw/">http://circnet.mbc.nctu.edu.tw/</a>                       |
| deepbase v2.0   | 2016 | Predict protein-circRNA co-expression networks                                                                                                                                           | <a href="http://biocenter.sysu.edu.cn/deepBase/">http://biocenter.sysu.edu.cn/deepBase/</a>         |
| circRNADb       | 2016 | Predict protein-coding function of circRNAs                                                                                                                                              | <a href="http://reprod.njmu.edu.cn/circrnadb">http://reprod.njmu.edu.cn/circrnadb</a>               |
| CSCD            | 2018 | Predict the microRNA response element sites of circRNAs;<br>Predict RNA binding protein sites of circRNAs;<br>Predict potential open reading frames of circRNAs                          | <a href="http://gb.whu.edu.cn/CSCD">http://gb.whu.edu.cn/CSCD</a>                                   |
| circIncRNAet    | 2018 | Analyze expression profiles, co-expression networks and pathways, and molecular interactomes of circRNAs according to user-defined criteria.                                             | <a href="http://app.cgu.edu.tw/circInc/">http://app.cgu.edu.tw/circInc/</a>                         |
